# Supplementary material
Source: MDPI journal article supplement (https://www.mdpi.com/2073-4395/13/7/1930)
Supplement: s1 [file s1]

**Table S1.** Primers used for qRT-PCR

| Gene           | Forward primers (5'-3') | Reverse primers (5'-3') |
|----------------|-------------------------|-------------------------|
| <i>FaETR2</i>  | CAAGGGATGCACTTCTACT     | TGGCTGTTACTGACCCATT     |
| <i>FaETR13</i> | CGGTGGTAGGAGGAACAACA    | CGGTGCTACCACCTAGTTCA    |
| <i>FaEIN2</i>  | GGTCTTCTGAGTTTGGGGCA    | GAAGGTGGCACTAGCTTGGT    |
| <i>FaEIN7</i>  | GGGTGACCTTGGAGAGGTTG    | ATCAATCCACAAGCCGCCAT    |
| <i>FaACT</i>   | TTCACGAGACCACCTATAACTC  | GCTCATCCTATCAGCGATT     |
